# Supplementary material for: Dose–Response Analysis of Nafamostat Mesylate in Pediatric Critical Care: Implications for Anticoagulation Monitoring During Continuous Venovenous Hemodiafiltration
Source: Research Square preprint supplement (doi:10.21203/rs.3.rs-6632150/v1), 2025-05-20
Supplement: Supplementary file 1 [file 7c5b0e1a250e2d7559794957.docx]

**Table S1. Mixed-effects regression**† **results for ACT in the non-extended LFT group**‡**.**

| Variables | Univariable | | |  | Multivariable | | |
| --- | --- | --- | --- | --- | --- | --- | --- |
| Coefficient β | SE | *P* |  | Coefficient β | SE | *P* |
| NM infusion rate, mg/kg/h | -6.062 | 5.205 | 0.244 |  |  |  |  |
| Age, years | -0.999 | 1.005 | 0.320 |  |  |  |  |
| Sex |  |  |  |  |  |  |  |
| Female | Reference | | |  |  |  |  |
| Male | -8.328 | 12.649 | 0.510 |  |  |  |  |
| Body weight, kg | -0.115 | 0.241 | 0.634 |  |  |  |  |
| Liver function test |  |  |  |  |  |  |  |
| AST, unit/L | -0.007 | 0.013 | 0.586 |  |  |  |  |
| ALT, unit/L | -0.017 | 0.023 | 0.454 |  |  |  |  |
| ALP, unit/L | -0.002 | 0.037 | 0.957 |  |  |  |  |
| Total bilirubin, mg/dL | 8.060 | 1.378 | <0.001 |  | 7.147 | 1.528 | <0.001 |
| GGT, unit/L | 0.009 | 0.016 | 0.584 |  |  |  |  |
| Transfusion§ |  |  |  |  |  |  |  |
| Fresh frozen plasma | 46.946 | 15.069 | 0.002 |  | 27.464 | 14.378 | 0.056 |
| Red blood cells | 6.191 | 8.099 | 0.445 |  |  |  |  |
| Platelets | -2.082 | 10.337 | 0.840 |  |  |  |  |

†The patient identifier served as the random effect in the mixed-effects regression model.

‡The non-extended LFT group includes cases in which both direct bilirubin and GGT were not measured.

§This refers to the transfusion status from 12 hours prior to the commencement of NM administration until the time of its administration.

ACT = activated clotting time, LFT = liver function test, SE = standard error, NM = nafamostat mesylate, AST = aspartate aminotransferase, ALT = alanine aminotransferase, ALP = alkaline phosphatase, GGT = gamma-glutamyl transferase

**Table S2. Mixed-effects regression† results for aPTT in the non-extended LFT group**‡**.**

| Variables | Univariable | | |  | Multivariable | | |
| --- | --- | --- | --- | --- | --- | --- | --- |
| Coefficient β | SE | *P* |  | Coefficient β | SE | *P* |
| NM infusion rate, mg/kg/h | 5.356 | 2.529 | 0.034 |  | 5.208 | 2.529 | 0.039 |
| Age, years | -0.736 | 0.464 | 0.113 |  |  |  |  |
| Sex |  |  |  |  |  |  |  |
| Female | Reference | | |  |  |  |  |
| Male | -2.753 | 5.963 | 0.644 |  |  |  |  |
| Body weight, kg | -0.205 | 0.119 | 0.084 |  |  |  |  |
| Liver function test |  |  |  |  |  |  |  |
| AST, unit/L | -0.003 | 0.004 | 0.504 |  |  |  |  |
| ALT, unit/L | -0.008 | 0.008 | 0.316 |  |  |  |  |
| ALP, unit/L | -9.503×10-5 | 0.022 | 0.997 |  |  |  |  |
| Total bilirubin, mg/dL | 1.078 | 0.545 | 0.048 |  | 1.031 | 0.524 | 0.049 |
| GGT, unit/L | 0.011 | 0.017 | 0.505 |  |  |  |  |
| Transfusion§ |  |  |  |  |  |  |  |
| Fresh frozen plasma | 4.263 | 8.009 | 0.594 |  |  |  |  |
| Red blood cells | -0.311 | 4.035 | 0.938 |  |  |  |  |
| Platelets | 4.881 | 4.433 | 0.271 |  |  |  |  |

†The patient identifier served as the random effect in the mixed-effects regression model.

‡The extended LFT group includes cases in which both direct bilirubin and GGT were measured in addition to routine liver function tests.

§This refers to the transfusion status from 12 hours prior to the commencement of NM administration until the time of its administration.

aPTT = activated partial thromboplastin time, SE = standard error, NM = nafamostat mesylate, AST = aspartate aminotransferase, ALT = alanine aminotransferase, ALP = alkaline phosphatase, GGT = gamma-glutamyl transferase

**Table S3. Mixed-effects regression**† **results for ACT in the extended LFT group**‡**.**

| Variables | Univariable | | |
| --- | --- | --- | --- |
| Coefficient β | SE | *P* |
| NM infusion rate, mg/kg/h | -2.476 | 3.463 | 0.475 |
| Age, years | -1.140 | 0.934 | 0.222 |
| Sex |  |  |  |
| Female | Reference | | |
| Male | -18.373 | 12.831 | 0.152 |
| Body weight, kg | -0.194 | 0.276 | 0.482 |
| Liver function test |  |  |  |
| AST, unit/L | 0.006 | 0.009 | 0.527 |
| ALT, unit/L | 0.005 | 0.011 | 0.622 |
| ALP, unit/L | -0.012 | 0.039 | 0.753 |
| Total bilirubin, mg/dL | 0.628 | 0.671 | 0.349 |
| Direct bilirubin, mg/dL | 0.726 | 0.926 | 0.433 |
| GGT, unit/L | -0.043 | 0.025 | 0.079 |
| Transfusion§ |  |  |  |
| Fresh frozen plasma | 2.807 | 15.373 | 0.855 |
| Red blood cells | -1.960 | 7.865 | 0.803 |
| Platelets | -10.876 | 7.611 | 0.153 |

†The patient identifier served as the random effect in the mixed-effects regression model.

‡The non-extended LFT group includes cases in which both direct bilirubin and GGT were not measured.

§This refers to the transfusion status from 12 hours prior to the commencement of NM administration until the time of its administration.

ACT = activated clotting time, LFT = liver function test, SE = standard error, NM = nafamostat mesylate, AST = aspartate aminotransferase, ALT = alanine aminotransferase, ALP = alkaline phosphatase, GGT = gamma-glutamyl transferase

**Table S4. Mixed-effects regression† results for aPTT in the extended LFT group**‡**.**

| Variables | Univariable | | |  | Multivariable | | |
| --- | --- | --- | --- | --- | --- | --- | --- |
| Coefficient β | SE | *P* |  | Coefficient β | SE | *P* |
| NM infusion rate, mg/kg/h | 12.714 | 1.508 | <0.001 |  | 12.373 | 1.568 | <0.001 |
| Age, years | -1.256 | 0.871 | 0.149 |  |  |  |  |
| Sex |  |  |  |  |  |  |  |
| Female | Reference | | |  |  |  |  |
| Male | 5.998 | 10.557 | 0.570 |  |  |  |  |
| Body weight, kg | -0.406 | 0.238 | 0.089 |  |  |  |  |
| Liver function test |  |  |  |  |  |  |  |
| AST, unit/L | 0.004 | 0.005 | 0.406 |  |  |  |  |
| ALT, unit/L | 0.003 | 0.008 | 0.667 |  |  |  |  |
| ALP, unit/L | -0.056 | 0.019 | 0.004 |  | -0.018 | 0.017 | 0.286 |
| Total bilirubin, mg/dL | 0.556 | 0.364 | 0.120 |  |  |  |  |
| Direct bilirubin, mg/dL | -0.067 | 0.571 | 0.907 |  |  |  |  |
| GGT, unit/L | -0.021 | 0.020 | 0.298 |  |  |  |  |
| Transfusion§ |  |  |  |  |  |  |  |
| Fresh frozen plasma | 6.460 | 8.211 | 0.431 |  |  |  |  |
| Red blood cells | -3.212 | 3.729 | 0.389 |  |  |  |  |
| Platelets | -4.951 | 3.880 | 0.202 |  |  |  |  |

†The patient identifier served as the random effect in the mixed-effects regression model.

‡The extended LFT group includes cases in which both direct bilirubin and GGT were measured in addition to routine liver function tests.

§This refers to the transfusion status from 12 hours prior to the commencement of NM administration until the time of its administration.

aPTT = activated partial thromboplastin time, SE = standard error, NM = nafamostat mesylate, AST = aspartate aminotransferase, ALT = alanine aminotransferase, ALP = alkaline phosphatase, GGT = gamma-glutamyl transferase

**Figure S1**. Scatter plots of NM infusion rate versus coagulation times in the non-extended LFT group.

In the non-extended LFT group, ACT showed a non-significant decreasing trend, while aPTT increased with higher NM infusion rates. Mixed-effects linear regression with a pseudonymized subject identifier as a random effect was used.

ACT = activated clotting time, aPTT = activated partial thromboplastin time, NM = nafamostat mesylate

**Figure S2**. Scatter plots of NM infusion rate vs. coagulation times in the extended LFT group.

In the extended LFT group, ACT remained uncorrelated with NM infusion rate, whereas aPTT consistently increased. Analysis was performed using mixed-effects linear regression with a pseudonymized subject identifier as a random effect.

ACT = activated clotting time, aPTT = activated partial thromboplastin time, NM = nafamostat mesylate


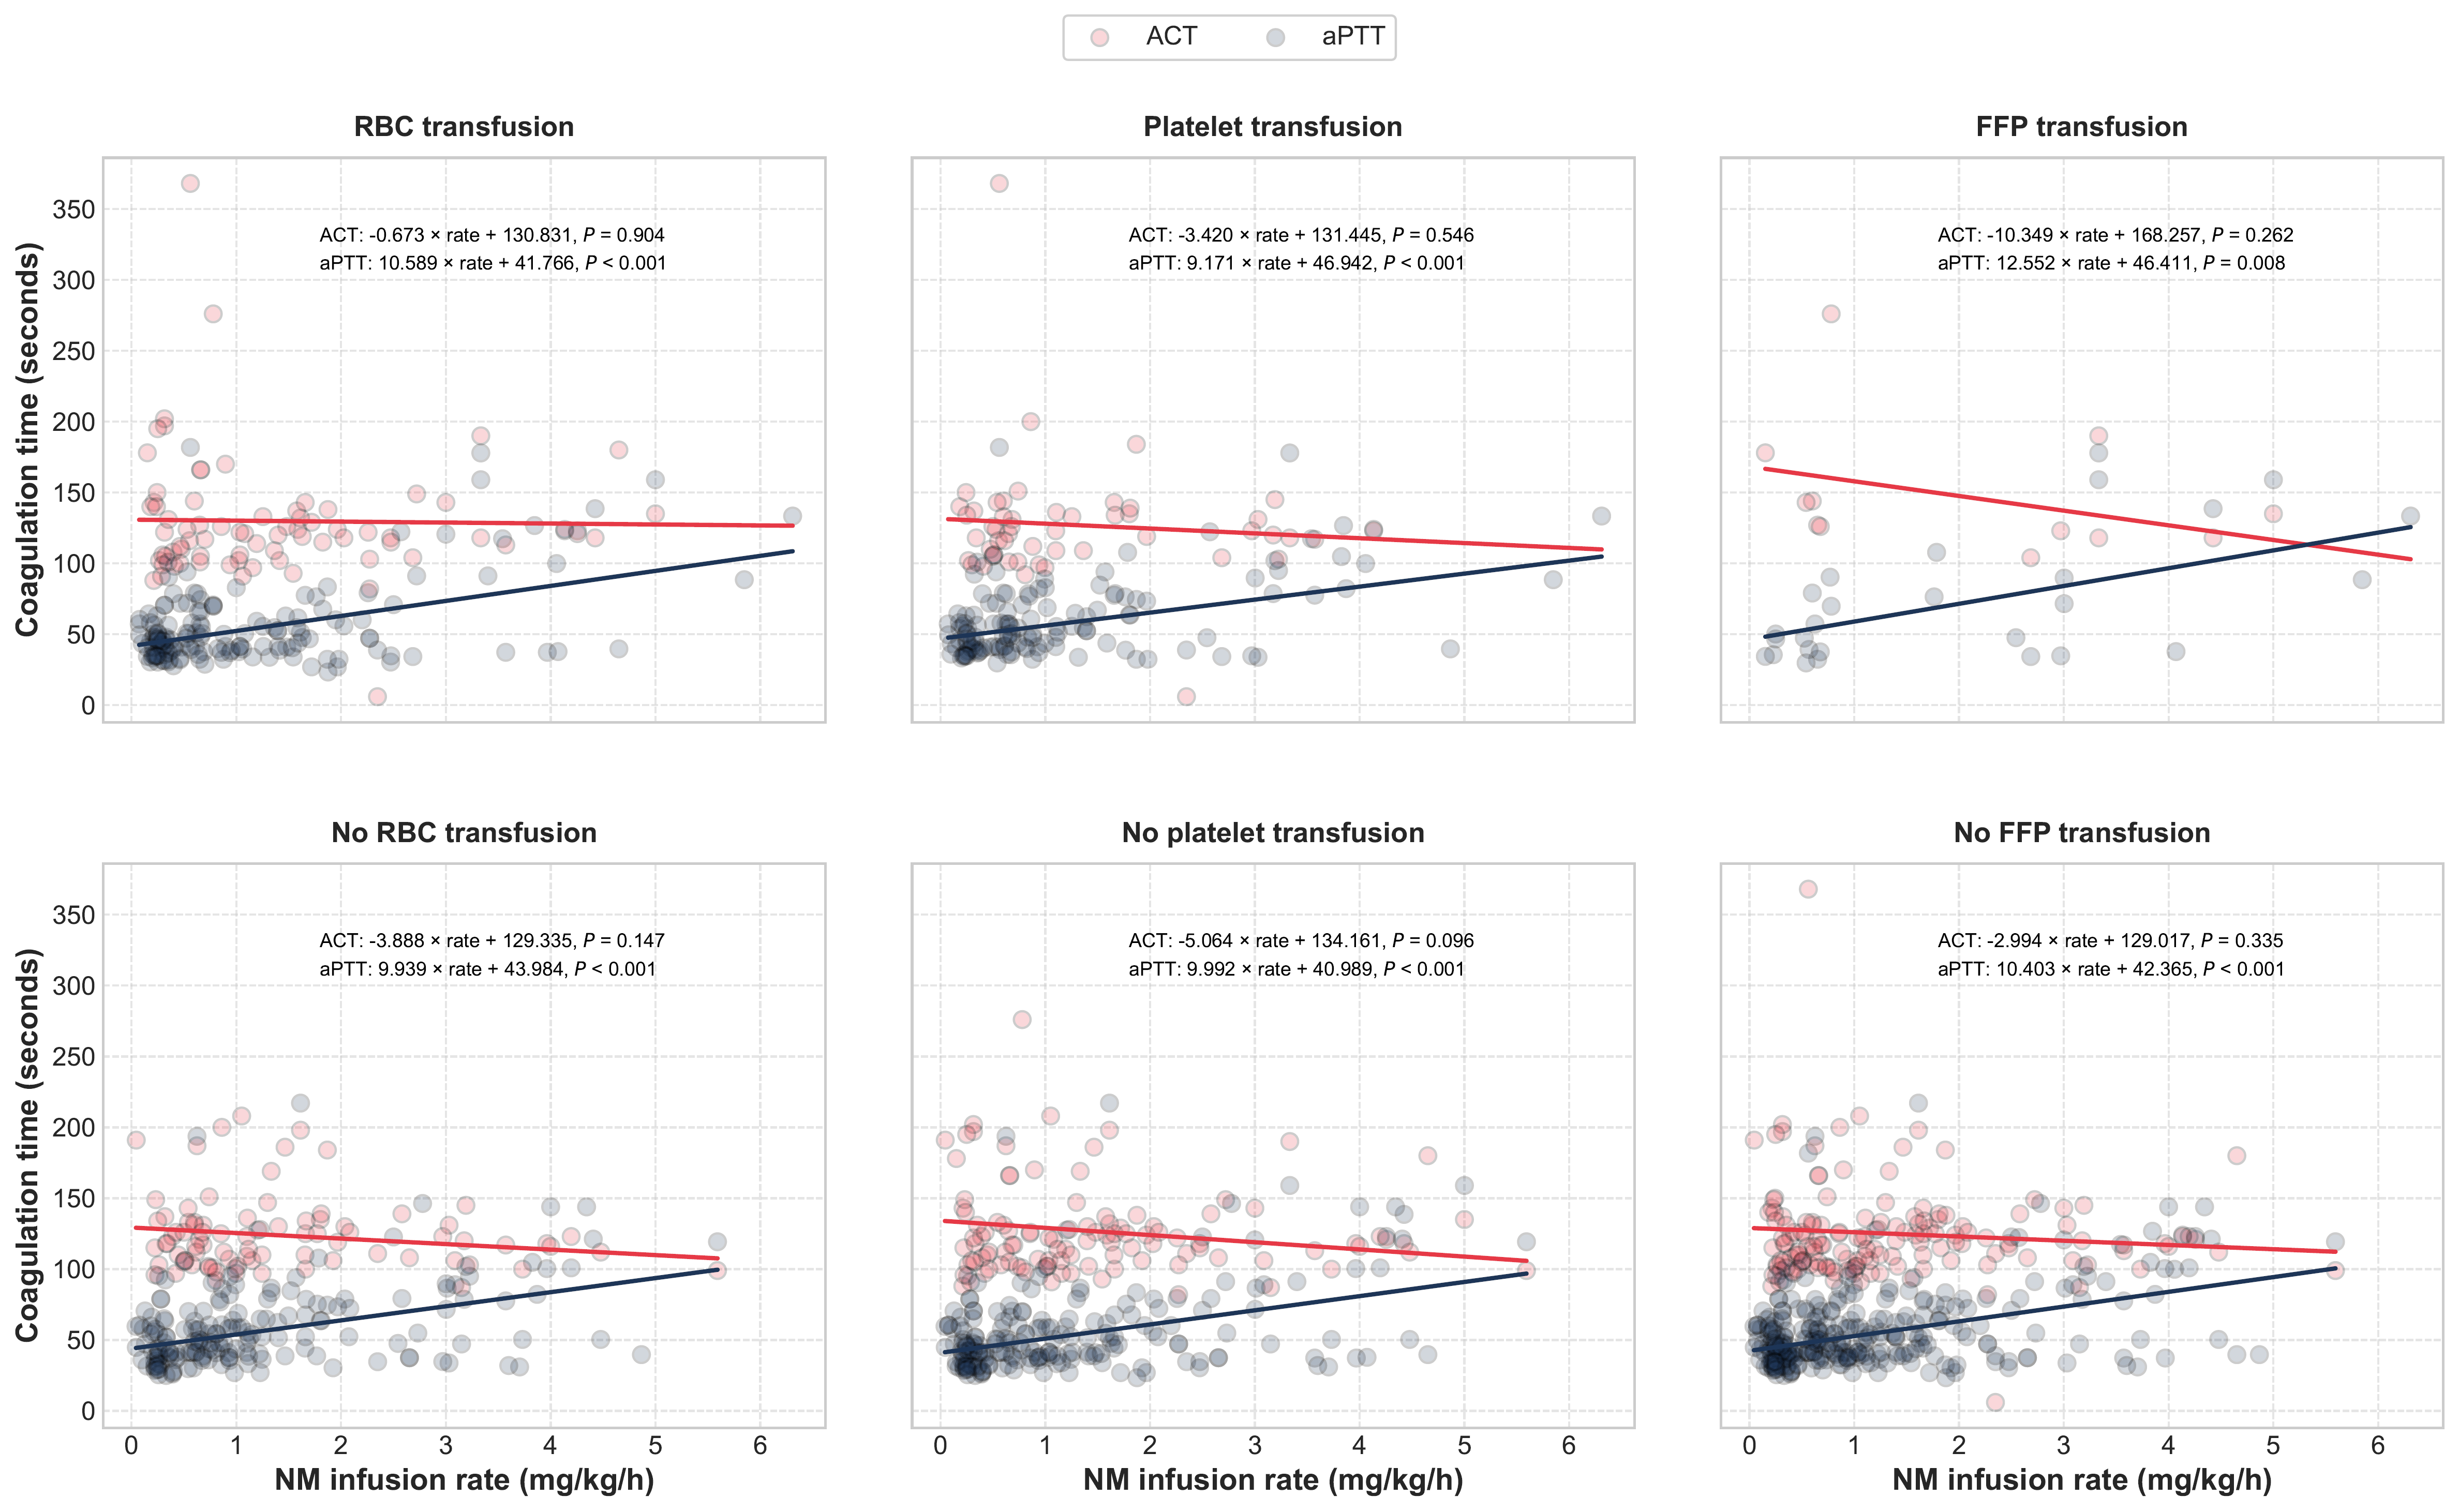


**Figure S3**. Subgroup analysis by transfusion status: mixed-effects regression of NM infusion rate and coagulation times.

Patients were stratified by transfusion history (RBCs, platelets, and FFP within 12 hours prior to NM order). Across all subgroups, NM infusion rate was significantly associated with aPTT but not with ACT. Mixed-effects regression with pseudonymized subject-level random effects was applied.

NM = nafamostat mesylate , ACT = activated clotting time, aPTT = activated partial thromboplastin time, RBC = red blood cell, FFP = fresh frozen plasma


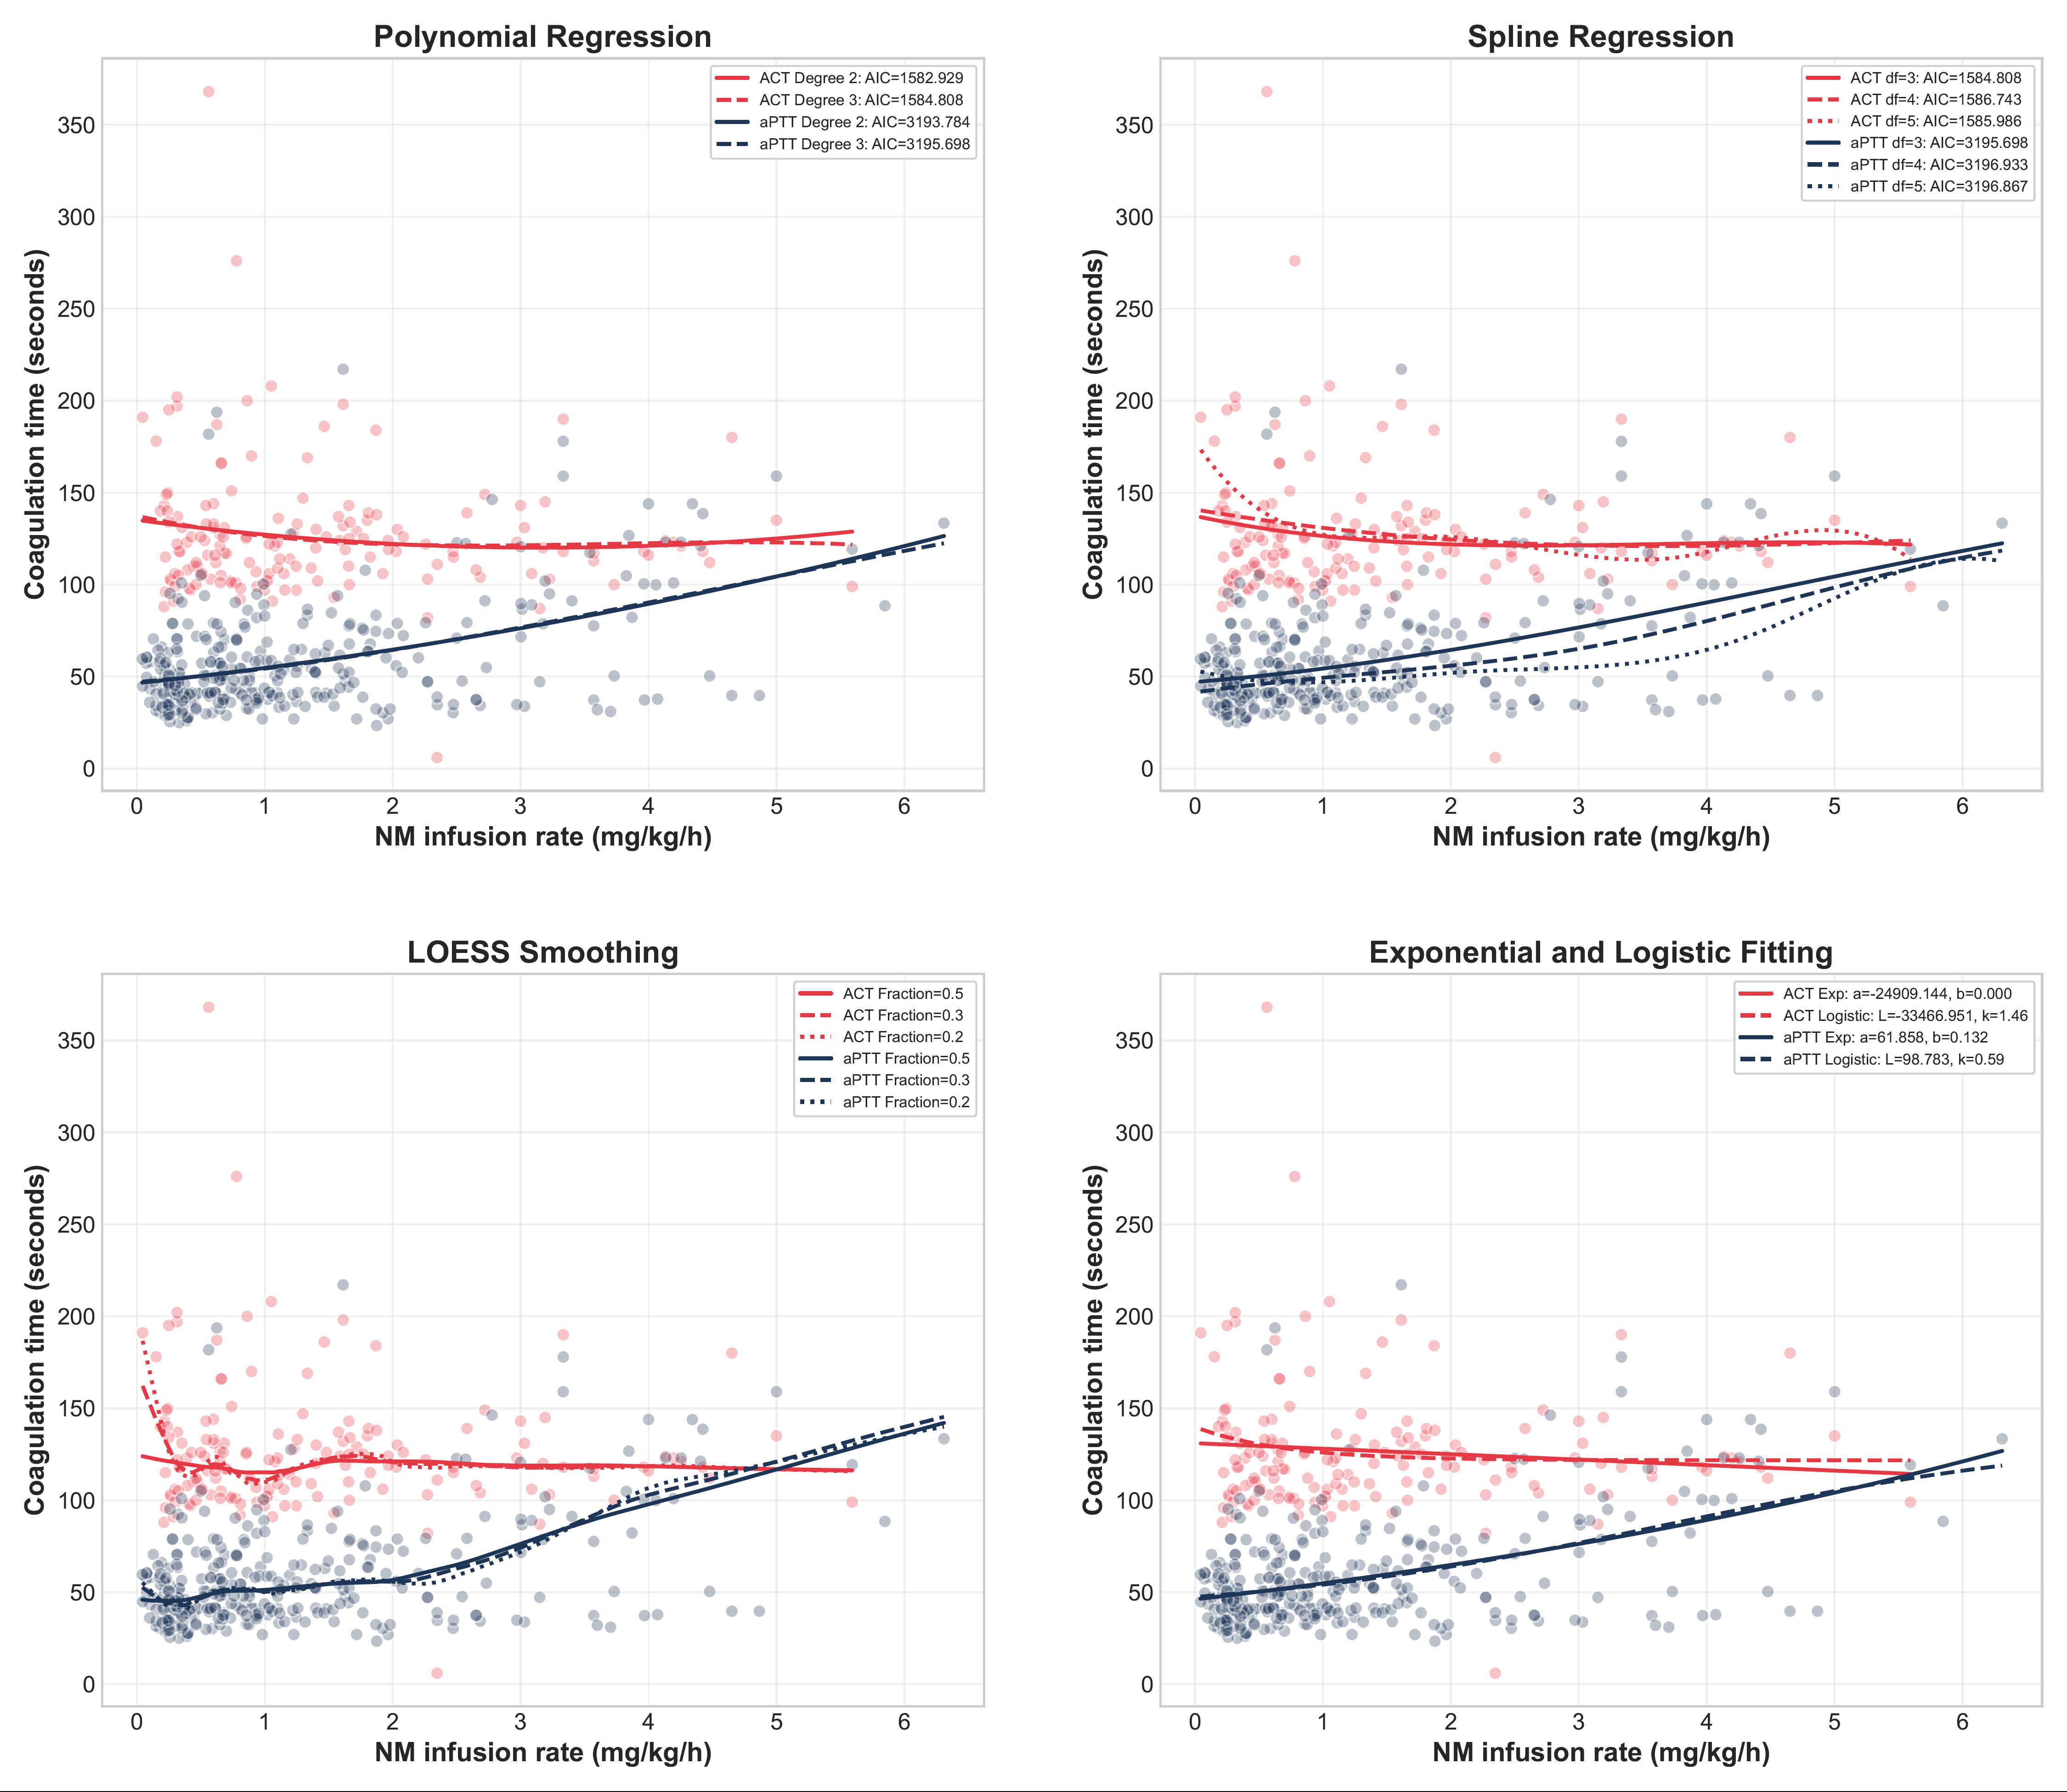


**Figure S4**. Non-linear regression analysis of NM infusion rate and coagulation times (total cohort).

Non-linear models (polynomial, spline, LOESS, exponential/logistic) were used to explore trends in ACT and aPTT across NM infusion rates in the overall cohort. aPTT consistently showed dose-dependent increases, while ACT displayed irregular or flat trends.

NM = nafamostat mesylate , LFT = liver function test, ACT = activated clotting time, aPTT = activated partial thromboplastin time, AIC = akaike information criterion, LOESS = locally estimated scatterplot smoothing


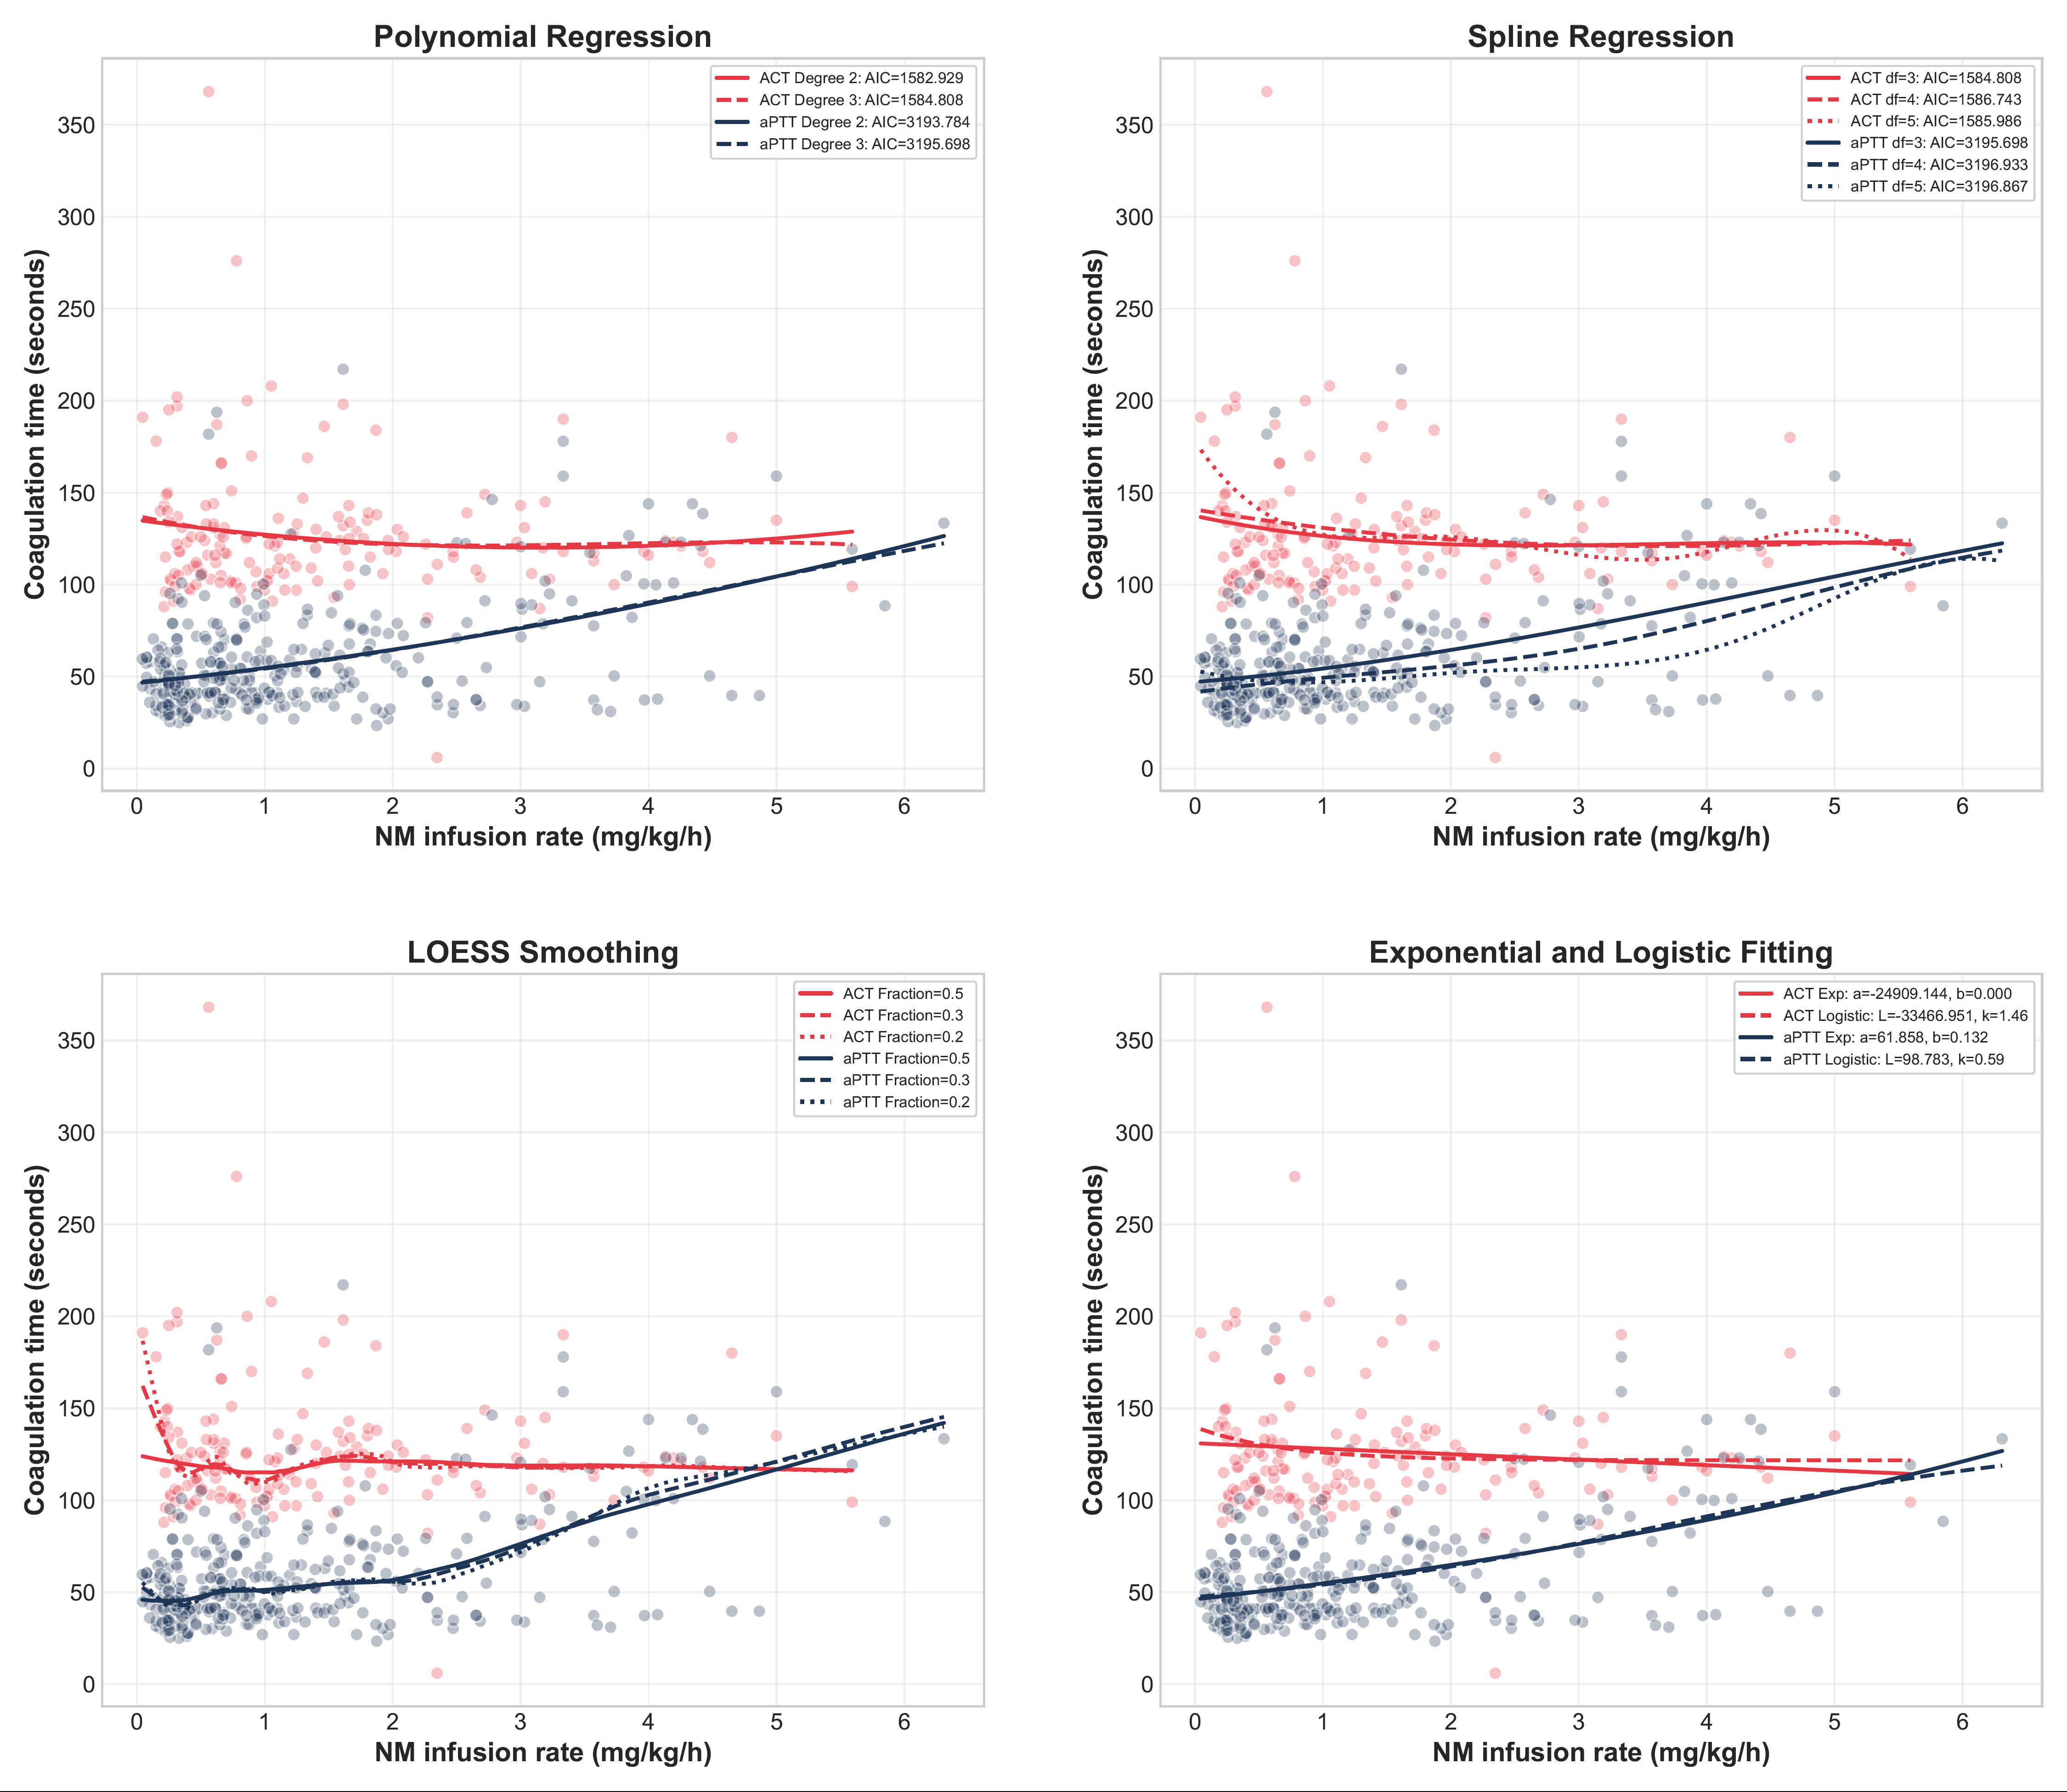


**Figure S5**. Non-linear regression in the non-extended LFT group.

aPTT in the non-extended LFT group increased with higher NM infusion rates, while ACT remained variable. Various non-linear regression methods were applied.

NM = nafamostat mesylate, LFT = liver function test, ACT = activated clotting time, aPTT = activated partial thromboplastin time, AIC = akaike information criterion, LOESS = locally estimated scatterplot smoothing


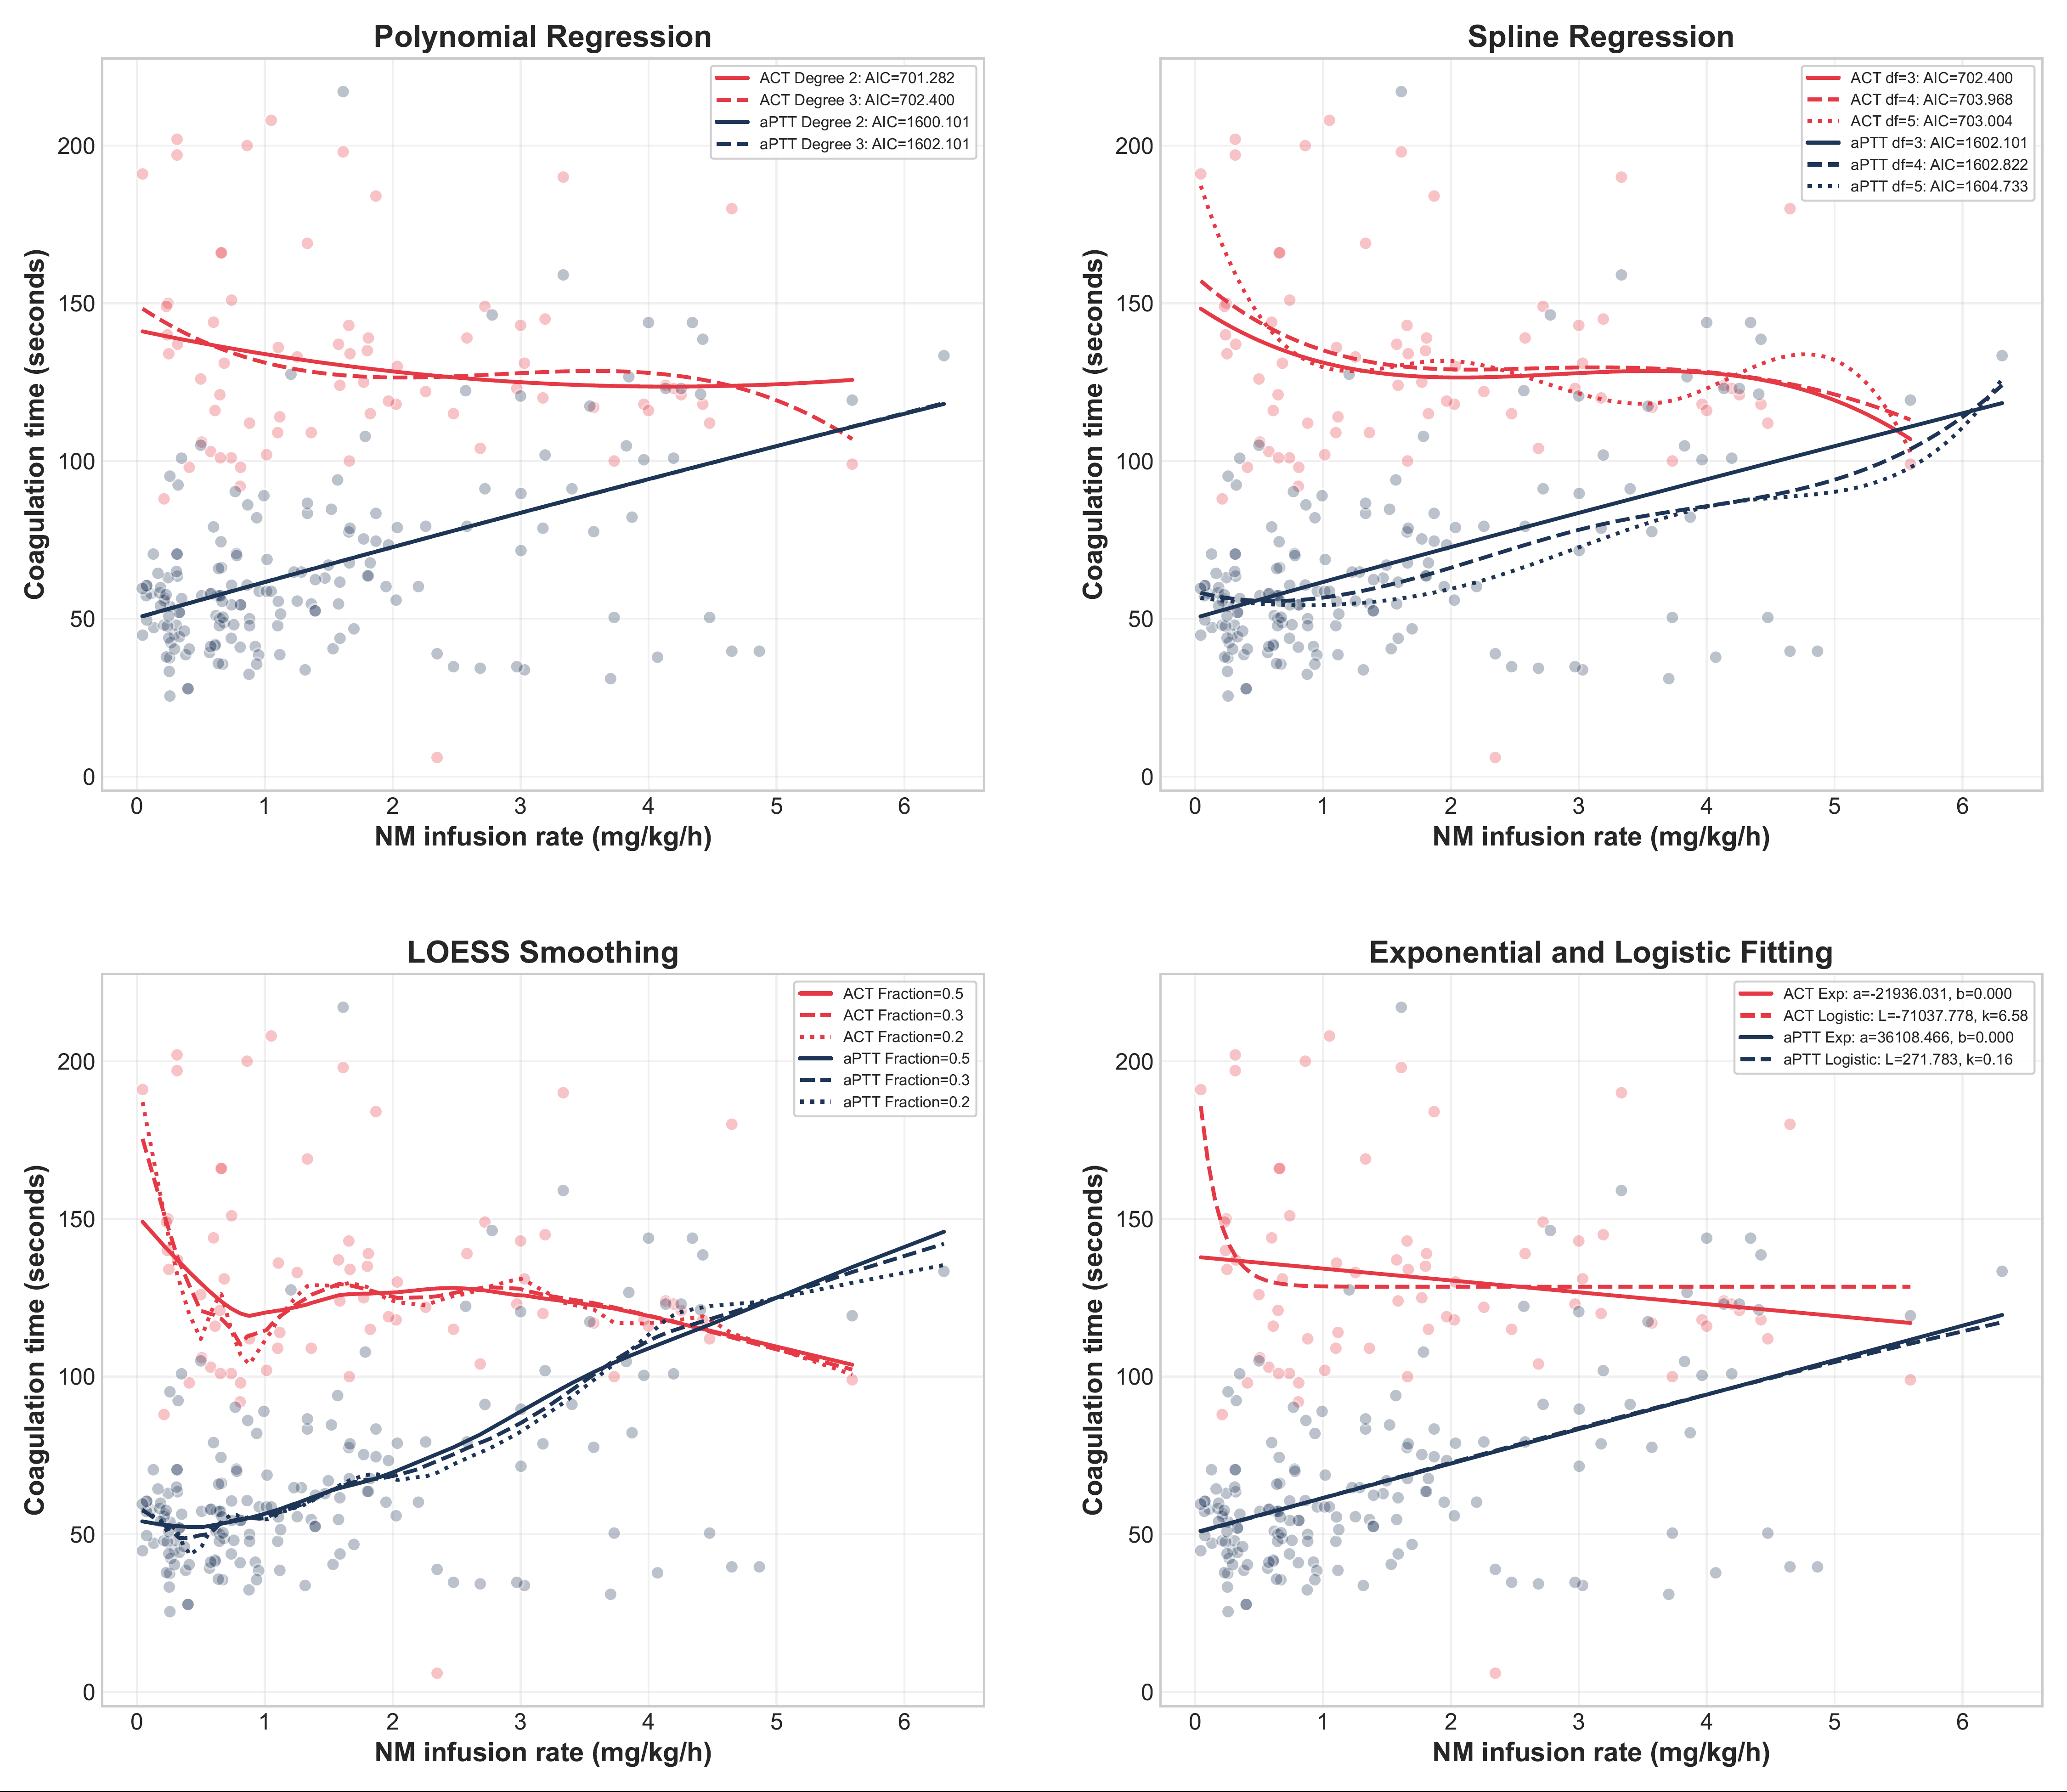


**Figure S6**. Non-linear regression in the extended LFT group.

In the extended LFT group, aPTT showed a clear dose-responsive increase across all models. ACT remained inconsistent.

NM = nafamostat mesylate, LFT = liver function test, ACT = activated clotting time, aPTT = activated partial thromboplastin time, AIC = akaike information criterion, LOESS = locally estimated scatterplot smoothing
